# Supplementary material for: A complex choreography of cell movements shapes the vertebrate eye
Source: PubMed Central journal article supplement — Development. 2012 Jan 15;139(2):359–72. doi: 10.1242/dev.071407 (PMC3243097; doi:10.1242/dev.071407), 2012-01-15
Supplement: supp_139.2.359_DEV071407TableS1.pdf [file supp_139.2.359_DEV071407TableS1.pdf]

**Table S1. Summary of cell tracking**

| Cell fate                       | 7/31/08 | 7/22/08 | 8/7/08 | Total      |
|---------------------------------|---------|---------|--------|------------|
| Neural retina                   | 42      | 13      | 15     | 70         |
| RPE                             | 20      | 9       | 9      | 38         |
| Lens                            | 27      | 5       | 11     | 43         |
| Other (optic stalk, mesenchyme) | –       | 2       | –      | 2          |
|                                 |         |         |        | <b>153</b> |

Number of cells tracked for each component tissue from three data sets; 7/31/08 is the primary data set.
