# Supplementary material for: A complex choreography of cell movements shapes the vertebrate eye
Source: PubMed Central journal article supplement — Development. 2012 Jan 15;139(2):359–72. doi: 10.1242/dev.071407 (PMC3243097; doi:10.1242/dev.071407), 2012-01-15
Supplement: supp_139.2.359_DEV071407TableS2.pdf [file supp_139.2.359_DEV071407TableS2.pdf]

**Table S2. Summary of cell clustering**

|               | Domain    | Cell number |
|---------------|-----------|-------------|
| <b>Retina</b> | Anterior  | 8           |
|               | Central   | 16          |
|               | Posterior | 4           |
|               | Dorsal    | 5           |
|               | Ventral   | 9           |
| <b>RPE</b>    | Anterior  | 5           |
|               | Central   | 7           |
|               | Posterior | 8           |
| <b>Lens</b>   | Anterior  | 17          |
|               | Posterior | 10          |

Number of cells tracked for each domain from the primary data set (7/31/08) only.
