# Supplementary figures and images for: A complex choreography of cell movements shapes the vertebrate eye
Source: PubMed Central journal article supplement — Development. 2012 Jan 15;139(2):359–72. doi: 10.1242/dev.071407 (PMC3243097; doi:10.1242/dev.071407), 2012-01-15

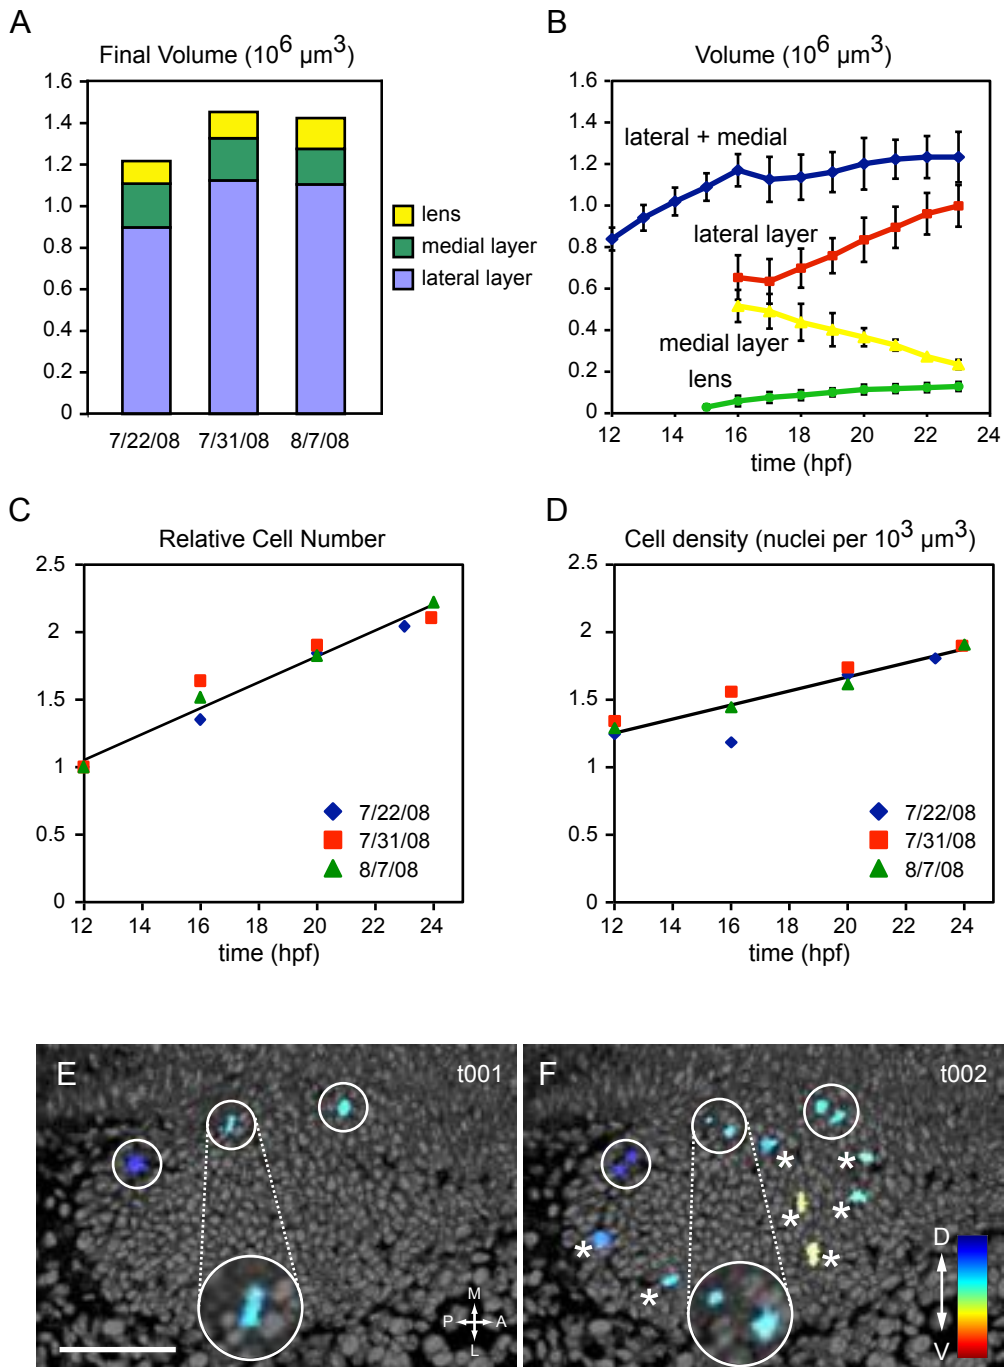

Supplement: supp_139.2.359_DEV071407FigS1.pdf [file supp_139.2.359_DEV071407FigS1.pdf]

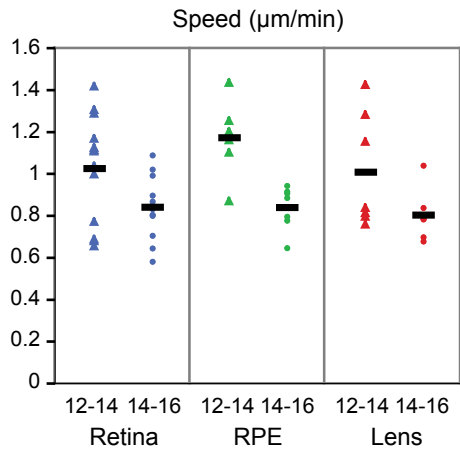

Supplement: supp_139.2.359_DEV071407FigS2.pdf [file supp_139.2.359_DEV071407FigS2.pdf]

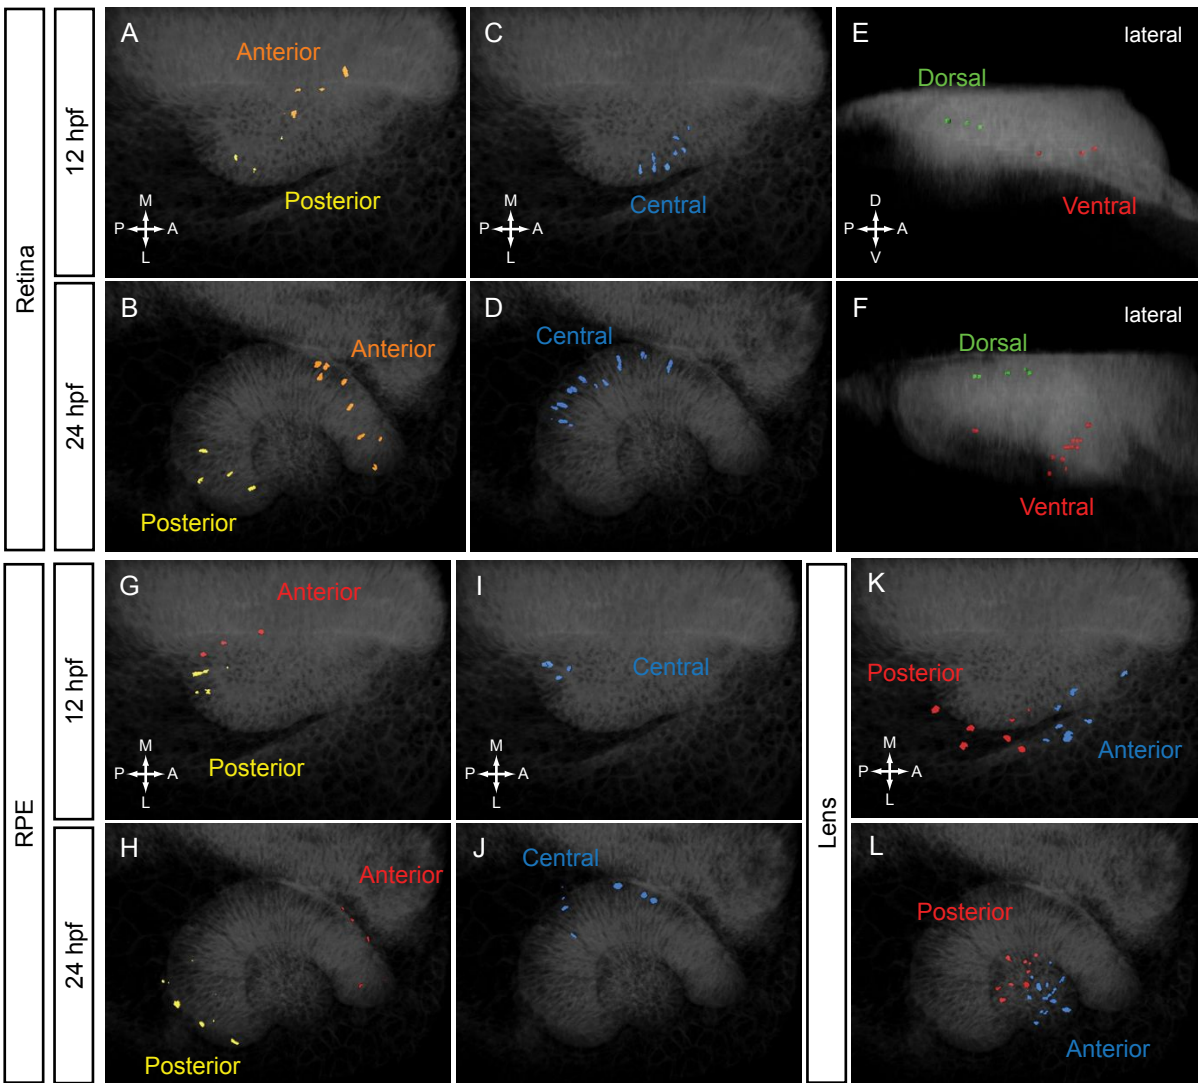

Supplement: supp_139.2.359_DEV071407FigS3.pdf [file supp_139.2.359_DEV071407FigS3.pdf]
